# Supplementary material
Source: publisher site journal article supplement (https://www.spandidos-publications.com/1388/downloadSupplementary)
Supplement: Supplementary file 1 [file downloadSupplementary]

## Sheet: SCI(DMSO) vs sham
Table SV. Kyoto Encyclopedia of Genes and Genomes analysis of downregulated genes in different groups.
##Databases: KEGG PATHWAY
##Statistical test method: hypergeometric test / Fisher's exact test
##FDR correction method: Benjamini and Hochberg
#Term	Database	ID	Input number	Background number	P-Value	Corrected P-Value	Input	KEGG_ID/KO	Entrez_ID	Hyperlink
Glutamatergic synapse	KEGG PATHWAY	mmu04724	24	114	1.28664e-06	0.000322947	ENSMUSG00000085830|ENSMUSG00000032766|ENSMUSG00000003974|ENSMUSG00000010064|ENSMUSG00000056755|ENSMUSG00000057614|ENSMUSG00000025892|ENSMUSG00000027669|ENSMUSG00000032017|ENSMUSG00000024211|ENSMUSG00000001986|ENSMUSG00000050211|ENSMUSG00000039579|ENSMUSG00000063594|ENSMUSG00000044005|ENSMUSG00000064202|ENSMUSG00000038738|ENSMUSG00000026959|ENSMUSG00000022376|ENSMUSG00000022935|ENSMUSG00000035745|…	mmu:14810|mmu:66066|mmu:108069|mmu:76257|mmu:108073|mmu:14677|mmu:14802|mmu:14696|mmu:110637|mmu:14823|mmu:53623|mmu:329502|mmu:242443|mmu:14709|mmu:216456|mmu:20510|mmu:243961|mmu:14810|mmu:11514|mmu:14805|mmu:170483|mmu:14806|mmu:14800|mmu:14814|	14810|66066|108069|76257|108073|14677|14802|14696|110637|14823|53623|329502|242443|14709|216456|20510|243961|14810|11514|14805|170483|14806|14800|14814|	http://www.genome.jp/kegg-bin/show_pathway?mmu04724/mmu:14814%09red/mmu:14810%09red/mmu:170483%09red/mmu:76257%09red/mmu:11514%09red/mmu:242443%09red/mmu:110637%09red/mmu:108069%09red/mmu:66066%09red/mmu:14823%09red/mmu:14709%09red/mmu:14677%09red/mmu:14805%09red/mmu:14696%09red/mmu:14806%09red/mmu:14800%09red/mmu:14802%09red/mmu:108073%09red/mmu:20510%09red/mmu:243961%09red/mmu:216456%09red/mmu:…
Axon guidance	KEGG PATHWAY	mmu04360	22	129	6.1653e-05	0.00773745	ENSMUSG00000031385|ENSMUSG00000032537|ENSMUSG00000003934|ENSMUSG00000029095|ENSMUSG00000028661|ENSMUSG00000057614|ENSMUSG00000026235|ENSMUSG00000029869|ENSMUSG00000059857|ENSMUSG00000025207|ENSMUSG00000052516|ENSMUSG00000028039|ENSMUSG00000031398|ENSMUSG00000031558|ENSMUSG00000022883|ENSMUSG00000039913|ENSMUSG00000028876|ENSMUSG00000060534|ENSMUSG00000027200|ENSMUSG00000052133|ENSMUSG00000063626|…	mmu:140571|mmu:270190|mmu:13643|mmu:231148|mmu:13842|mmu:14677|mmu:13838|mmu:13848|mmu:80883|mmu:26456|mmu:268902|mmu:13638|mmu:18846|mmu:20563|mmu:19876|mmu:241656|mmu:13837|mmu:13176|mmu:214968|mmu:20357|mmu:210801|mmu:107449|	140571|270190|13643|231148|13842|14677|13838|13848|80883|26456|268902|13638|18846|20563|19876|241656|13837|13176|214968|20357|210801|107449|	http://www.genome.jp/kegg-bin/show_pathway?mmu04360/mmu:231148%09red/mmu:20563%09red/mmu:13848%09red/mmu:13837%09red/mmu:241656%09red/mmu:13842%09red/mmu:80883%09red/mmu:20357%09red/mmu:13638%09red/mmu:19876%09red/mmu:107449%09red/mmu:140571%09red/mmu:214968%09red/mmu:14677%09red/mmu:270190%09red/mmu:18846%09red/mmu:13838%09red/mmu:268902%09red/mmu:13643%09red/mmu:13176%09red/mmu:210801%09red/mmu…
Nicotine addiction	KEGG PATHWAY	mmu05033	11	40	0.00013371	0.0111871	ENSMUSG00000085830|ENSMUSG00000025892|ENSMUSG00000035745|ENSMUSG00000033981|ENSMUSG00000001986|ENSMUSG00000002771|ENSMUSG00000026959|ENSMUSG00000039579|ENSMUSG00000029212|ENSMUSG00000007653|ENSMUSG00000029211	mmu:14810|mmu:14802|mmu:170483|mmu:14800|mmu:53623|mmu:14814|mmu:14810|mmu:242443|mmu:14400|mmu:14401|mmu:14397|	14810|14802|170483|14800|53623|14814|14810|242443|14400|14401|14397|	http://www.genome.jp/kegg-bin/show_pathway?mmu05033/mmu:14401%09red/mmu:14400%09red/mmu:14397%09red/mmu:53623%09red/mmu:14814%09red/mmu:14800%09red/mmu:14810%09red/mmu:14802%09red/mmu:170483%09red/mmu:242443%09red
Other glycan degradation	KEGG PATHWAY	mmu00511	7	18	0.000415103	0.0214086	ENSMUSG00000034000|ENSMUSG00000029119|ENSMUSG00000005142|ENSMUSG00000039307|ENSMUSG00000045594|ENSMUSG00000028467|ENSMUSG00000032295	mmu:241159|mmu:17160|mmu:17159|mmu:238023|mmu:12091|mmu:230101|mmu:73744|	241159|17160|17159|238023|12091|230101|73744|	http://www.genome.jp/kegg-bin/show_pathway?mmu00511/mmu:73744%09red/mmu:241159%09red/mmu:17160%09red/mmu:17159%09red/mmu:230101%09red/mmu:238023%09red/mmu:12091%09red
Basal cell carcinoma	KEGG PATHWAY	mmu05217	12	55	0.000426465	0.0214086	ENSMUSG00000048402|ENSMUSG00000030093|ENSMUSG00000029071|ENSMUSG00000001761|ENSMUSG00000064325|ENSMUSG00000020888|ENSMUSG00000020135|ENSMUSG00000021466|ENSMUSG00000081683|ENSMUSG00000036961|ENSMUSG00000025407|ENSMUSG00000021318	mmu:14633|mmu:22421|mmu:13542|mmu:319757|mmu:15245|mmu:13543|mmu:23805|mmu:19206|mmu:93897|mmu:22423|mmu:14632|mmu:14634|	14633|22421|13542|319757|15245|13543|23805|19206|93897|22423|14632|14634|	http://www.genome.jp/kegg-bin/show_pathway?mmu05217/mmu:15245%09red/mmu:93897%09red/mmu:319757%09red/mmu:13543%09red/mmu:13542%09red/mmu:22423%09red/mmu:19206%09red/mmu:22421%09red/mmu:23805%09red/mmu:14634%09red/mmu:14632%09red/mmu:14633%09red
ABC transporters	KEGG PATHWAY	mmu02010	10	46	0.00129061	0.0539904	ENSMUSG00000031378|ENSMUSG00000020620|ENSMUSG00000022822|ENSMUSG00000035722|ENSMUSG00000042476|ENSMUSG00000041828|ENSMUSG00000028973|ENSMUSG00000032842|ENSMUSG00000041797|ENSMUSG00000024030	mmu:11666|mmu:27404|mmu:27416|mmu:27403|mmu:18670|mmu:217258|mmu:74610|mmu:224814|mmu:217262|mmu:11307|	11666|27404|27416|27403|18670|217258|74610|224814|217262|11307|	http://www.genome.jp/kegg-bin/show_pathway?mmu02010/mmu:224814%09red/mmu:11307%09red/mmu:217262%09red/mmu:74610%09red/mmu:27404%09red/mmu:11666%09red/mmu:27416%09red/mmu:27403%09red/mmu:217258%09red/mmu:18670%09red

## Sheet: SCI(VX-765) vs SCI(DMSO)
Table SV. Kyoto Encyclopedia of Genes and Genomes analysis of downregulated genes in different groups.
##Databases: KEGG PATHWAY
##Statistical test method: hypergeometric test / Fisher's exact test
##FDR correction method: Benjamini and Hochberg
#Term	Database	ID	Input number	Background number	P-Value	Corrected P-Value	Input	KEGG_ID/KO	Entrez_ID	Hyperlink
Focal adhesion	KEGG PATHWAY	mmu04510	49	207	7.64539e-06	0.00198016	ENSMUSG00000022836|ENSMUSG00000048126|ENSMUSG00000009376|ENSMUSG00000028364|ENSMUSG00000001930|ENSMUSG00000022781|ENSMUSG00000026509|ENSMUSG00000034165|ENSMUSG00000026193|ENSMUSG00000052681|ENSMUSG00000030403|ENSMUSG00000058325|ENSMUSG00000000555|ENSMUSG00000002900|ENSMUSG00000027009|ENSMUSG00000000489|ENSMUSG00000024620|ENSMUSG00000029648|ENSMUSG00000042284|ENSMUSG00000004056|ENSMUSG00000070348|…	mmu:107589|mmu:12835|mmu:17295|mmu:21923|mmu:22371|mmu:224105|mmu:12334|mmu:12445|mmu:14268|mmu:215449|mmu:22323|mmu:330662|mmu:16402|mmu:16777|mmu:16401|mmu:18591|mmu:18596|mmu:14254|mmu:109700|mmu:11652|mmu:12443|mmu:16001|mmu:21826|mmu:16775|mmu:21828|mmu:109711|mmu:13367|mmu:18595|mmu:16412|mmu:14257|mmu:18654|mmu:53867|mmu:21894|mmu:16542|mmu:54635|mmu:12444|mmu:20750|mmu:21825|mmu:12043|mmu…	107589|12835|17295|21923|22371|224105|12334|12445|14268|215449|22323|330662|16402|16777|16401|18591|18596|14254|109700|11652|12443|16001|21826|16775|21828|109711|13367|18595|16412|14257|18654|53867|21894|16542|54635|12444|20750|21825|12043|192176|12827|12826|98932|13866|170736|16403|12389|12390|271849|	http://www.genome.jp/kegg-bin/show_pathway?mmu04510/mmu:224105%09red/mmu:16775%09red/mmu:16777%09red/mmu:16542%09red/mmu:12334%09red/mmu:22371%09red/mmu:16403%09red/mmu:16402%09red/mmu:16401%09red/mmu:18596%09red/mmu:21923%09red/mmu:192176%09red/mmu:21826%09red/mmu:21825%09red/mmu:12390%09red/mmu:170736%09red/mmu:13866%09red/mmu:13367%09red/mmu:21894%09red/mmu:109700%09red/mmu:12043%09red/mmu:218…
Malaria	KEGG PATHWAY	mmu05144	19	48	2.16224e-05	0.00241727	ENSMUSG00000038067|ENSMUSG00000027962|ENSMUSG00000030830|ENSMUSG00000040152|ENSMUSG00000032508|ENSMUSG00000000290|ENSMUSG00000021253|ENSMUSG00000021702|ENSMUSG00000020717|ENSMUSG00000026582|ENSMUSG00000009376|ENSMUSG00000026580|ENSMUSG00000035352|ENSMUSG00000002944|ENSMUSG00000023885|ENSMUSG00000027398|ENSMUSG00000037872|ENSMUSG00000020592|ENSMUSG00000039005	mmu:12985|mmu:22329|mmu:16408|mmu:21825|mmu:17874|mmu:16414|mmu:21809|mmu:21828|mmu:18613|mmu:20339|mmu:17295|mmu:20344|mmu:20293|mmu:12491|mmu:21826|mmu:16176|mmu:13349|mmu:20969|mmu:21898|	12985|22329|16408|21825|17874|16414|21809|21828|18613|20339|17295|20344|20293|12491|21826|16176|13349|20969|21898|	http://www.genome.jp/kegg-bin/show_pathway?mmu05144/mmu:21809%09red/mmu:12985%09red/mmu:16414%09red/mmu:12491%09red/mmu:16408%09red/mmu:17295%09red/mmu:22329%09red/mmu:21898%09red/mmu:21828%09red/mmu:20293%09red/mmu:13349%09red/mmu:20969%09red/mmu:20339%09red/mmu:16176%09red/mmu:20344%09red/mmu:21826%09red/mmu:21825%09red/mmu:18613%09red/mmu:17874%09red
Cytokine-cytokine receptor interaction	KEGG PATHWAY	mmu04060	56	264	2.79992e-05	0.00241727	ENSMUSG00000038067|ENSMUSG00000020009|ENSMUSG00000030339|ENSMUSG00000032440|ENSMUSG00000021756|ENSMUSG00000040329|ENSMUSG00000009376|ENSMUSG00000067336|ENSMUSG00000028362|ENSMUSG00000002897|ENSMUSG00000019122|ENSMUSG00000058755|ENSMUSG00000022971|ENSMUSG00000005824|ENSMUSG00000005268|ENSMUSG00000063727|ENSMUSG00000061353|ENSMUSG00000000489|ENSMUSG00000025804|ENSMUSG00000024620|ENSMUSG00000029648|…	mmu:12985|mmu:15979|mmu:17000|mmu:21813|mmu:16195|mmu:16196|mmu:17295|mmu:12168|mmu:21949|mmu:16172|mmu:20308|mmu:18413|mmu:15976|mmu:50930|mmu:19116|mmu:18383|mmu:20315|mmu:18591|mmu:12768|mmu:18596|mmu:14254|mmu:16174|mmu:20305|mmu:16880|mmu:17311|mmu:12772|mmu:20293|mmu:12983|mmu:12983|mmu:22035|mmu:54635|mmu:18595|mmu:21809|mmu:21937|mmu:16180|mmu:16190|mmu:16176|mmu:12765|mmu:20311|mmu:16542…	12985|15979|17000|21813|16195|16196|17295|12168|21949|16172|20308|18413|15976|50930|19116|18383|20315|18591|12768|18596|14254|16174|20305|16880|17311|12772|20293|12983|12983|22035|54635|18595|21809|21937|16180|16190|16176|12765|20311|16542|14257|21936|12167|245527|21934|16164|16177|13051|16323|18414|16155|12986|16178|12774|14102|16182|	http://www.genome.jp/kegg-bin/show_pathway?mmu04060/mmu:17311%09red/mmu:21949%09red/mmu:16542%09red/mmu:22035%09red/mmu:21809%09red/mmu:12167%09red/mmu:12168%09red/mmu:16190%09red/mmu:16195%09red/mmu:16196%09red/mmu:12774%09red/mmu:12772%09red/mmu:21813%09red/mmu:13051%09red/mmu:16164%09red/mmu:20311%09red/mmu:20315%09red/mmu:18595%09red/mmu:20305%09red/mmu:16880%09red/mmu:14102%09red/mmu:16176%0…
Measles	KEGG PATHWAY	mmu05162	32	137	0.000329291	0.0193737	ENSMUSG00000020009|ENSMUSG00000032661|ENSMUSG00000034165|ENSMUSG00000026656|ENSMUSG00000003031|ENSMUSG00000031207|ENSMUSG00000004056|ENSMUSG00000043463|ENSMUSG00000032508|ENSMUSG00000003184|ENSMUSG00000031805|ENSMUSG00000070348|ENSMUSG00000022971|ENSMUSG00000026104|ENSMUSG00000052776|ENSMUSG00000000184|ENSMUSG00000039304|ENSMUSG00000040274|ENSMUSG00000039005|ENSMUSG00000031494|ENSMUSG00000059883|…	mmu:15979|mmu:246727|mmu:12445|mmu:14130|mmu:12576|mmu:17698|mmu:11652|mmu:319642|mmu:17874|mmu:54131|mmu:16453|mmu:12443|mmu:15976|mmu:20846|mmu:246730|mmu:12444|mmu:22035|mmu:12571|mmu:21898|mmu:170786|mmu:266632|mmu:16176|mmu:71586|mmu:54123|mmu:20848|mmu:230073|mmu:246728|mmu:16391|mmu:20847|mmu:12567|mmu:13665|mmu:14102|	15979|246727|12445|14130|12576|17698|11652|319642|17874|54131|16453|12443|15976|20846|246730|12444|22035|12571|21898|170786|266632|16176|71586|54123|20848|230073|246728|16391|20847|12567|13665|14102|	http://www.genome.jp/kegg-bin/show_pathway?mmu05162/mmu:12571%09red/mmu:14130%09red/mmu:16391%09red/mmu:22035%09red/mmu:15976%09red/mmu:246727%09red/mmu:246728%09red/mmu:71586%09red/mmu:12576%09red/mmu:54131%09red/mmu:20848%09red/mmu:20846%09red/mmu:20847%09red/mmu:15979%09red/mmu:17874%09red/mmu:14102%09red/mmu:16453%09red/mmu:230073%09red/mmu:12567%09red/mmu:21898%09red/mmu:17698%09red/mmu:1165…
Leukocyte transendothelial migration	KEGG PATHWAY	mmu04670	29	121	0.000428144	0.0193737	ENSMUSG00000020717|ENSMUSG00000052397|ENSMUSG00000031990|ENSMUSG00000031207|ENSMUSG00000029204|ENSMUSG00000052681|ENSMUSG00000030403|ENSMUSG00000006519|ENSMUSG00000041378|ENSMUSG00000061353|ENSMUSG00000027009|ENSMUSG00000037815|ENSMUSG00000015143|ENSMUSG00000071715|ENSMUSG00000027962|ENSMUSG00000001946|ENSMUSG00000026480|ENSMUSG00000030786|ENSMUSG00000025809|ENSMUSG00000015340|ENSMUSG00000030830|…	mmu:18613|mmu:22350|mmu:83964|mmu:17698|mmu:74734|mmu:215449|mmu:22323|mmu:13057|mmu:12741|mmu:20315|mmu:16401|mmu:12385|mmu:109711|mmu:17972|mmu:22329|mmu:69524|mmu:17970|mmu:16409|mmu:16412|mmu:13058|mmu:16408|mmu:16414|mmu:223864|mmu:98932|mmu:242653|mmu:17969|mmu:16456|mmu:18260|mmu:12562|	18613|22350|83964|17698|74734|215449|22323|13057|12741|20315|16401|12385|109711|17972|22329|69524|17970|16409|16412|13058|16408|16414|223864|98932|242653|17969|16456|18260|12562|	http://www.genome.jp/kegg-bin/show_pathway?mmu04670/mmu:22350%09red/mmu:242653%09red/mmu:215449%09red/mmu:16409%09red/mmu:16408%09red/mmu:83964%09red/mmu:16401%09red/mmu:12562%09red/mmu:74734%09red/mmu:17970%09red/mmu:17972%09red/mmu:20315%09red/mmu:16456%09red/mmu:69524%09red/mmu:16412%09red/mmu:16414%09red/mmu:22323%09red/mmu:22329%09red/mmu:223864%09red/mmu:17698%09red/mmu:12385%09red/mmu:1861…
Hematopoietic cell lineage	KEGG PATHWAY	mmu04640	23	86	0.00045408	0.0193737	ENSMUSG00000038067|ENSMUSG00000040329|ENSMUSG00000039062|ENSMUSG00000000555|ENSMUSG00000027009|ENSMUSG00000042284|ENSMUSG00000015947|ENSMUSG00000019966|ENSMUSG00000027111|ENSMUSG00000030786|ENSMUSG00000030342|ENSMUSG00000030748|ENSMUSG00000029084|ENSMUSG00000002944|ENSMUSG00000016494|ENSMUSG00000027398|ENSMUSG00000028859|ENSMUSG00000051439|ENSMUSG00000004609|ENSMUSG00000032679|ENSMUSG00000047139|…	mmu:12985|mmu:16196|mmu:16790|mmu:16402|mmu:16401|mmu:109700|mmu:14129|mmu:17311|mmu:16403|mmu:16409|mmu:12527|mmu:16190|mmu:12494|mmu:12491|mmu:12490|mmu:16176|mmu:12986|mmu:12475|mmu:12489|mmu:12509|mmu:12484|mmu:16178|mmu:16177|	12985|16196|16790|16402|16401|109700|14129|17311|16403|16409|12527|16190|12494|12491|12490|16176|12986|12475|12489|12509|12484|16178|16177|	http://www.genome.jp/kegg-bin/show_pathway?mmu04640/mmu:12494%09red/mmu:17311%09red/mmu:12490%09red/mmu:12491%09red/mmu:16409%09red/mmu:16790%09red/mmu:16403%09red/mmu:16402%09red/mmu:16401%09red/mmu:16190%09red/mmu:16196%09red/mmu:12509%09red/mmu:109700%09red/mmu:12475%09red/mmu:12986%09red/mmu:12985%09red/mmu:12484%09red/mmu:12489%09red/mmu:12527%09red/mmu:14129%09red/mmu:16177%09red/mmu:16176%…
PI3K-Akt signaling pathway	KEGG PATHWAY	mmu04151	63	351	0.000571564	0.0193737	ENSMUSG00000038067|ENSMUSG00000009376|ENSMUSG00000048126|ENSMUSG00000040329|ENSMUSG00000028364|ENSMUSG00000001930|ENSMUSG00000027954|ENSMUSG00000029304|ENSMUSG00000037225|ENSMUSG00000003031|ENSMUSG00000058755|ENSMUSG00000026193|ENSMUSG00000005534|ENSMUSG00000004056|ENSMUSG00000031565|ENSMUSG00000005533|ENSMUSG00000000555|ENSMUSG00000002900|ENSMUSG00000006728|ENSMUSG00000027009|ENSMUSG00000027230|…	mmu:12985|mmu:17295|mmu:12835|mmu:16196|mmu:21923|mmu:22371|mmu:13636|mmu:20750|mmu:14173|mmu:12576|mmu:18413|mmu:14268|mmu:16337|mmu:11652|mmu:14182|mmu:16001|mmu:16402|mmu:16777|mmu:12567|mmu:16401|mmu:26427|mmu:243764|mmu:18596|mmu:14254|mmu:109700|mmu:16453|mmu:73699|mmu:14172|mmu:15976|mmu:11601|mmu:17311|mmu:21826|mmu:21828|mmu:16403|mmu:18414|mmu:12571|mmu:12443|mmu:19116|mmu:12445|mmu:164…	12985|17295|12835|16196|21923|22371|13636|20750|14173|12576|18413|14268|16337|11652|14182|16001|16402|16777|12567|16401|26427|243764|18596|14254|109700|16453|73699|14172|15976|11601|17311|21826|21828|16403|18414|12571|12443|19116|12445|16412|18595|13685|14257|18127|16190|18654|13640|14186|18591|16542|54635|12444|12986|21825|263803|12043|12827|12826|12912|16775|21687|21898|53867|	http://www.genome.jp/kegg-bin/show_pathway?mmu04151/mmu:13685%09red/mmu:17311%09red/mmu:12571%09red/mmu:18413%09red/mmu:16775%09red/mmu:12576%09red/mmu:16777%09red/mmu:16542%09red/mmu:14173%09red/mmu:22371%09red/mmu:16403%09red/mmu:16402%09red/mmu:16401%09red/mmu:15976%09red/mmu:12567%09red/mmu:21923%09red/mmu:21826%09red/mmu:16190%09red/mmu:21825%09red/mmu:16337%09red/mmu:16196%09red/mmu:14186%0…
Rap1 signaling pathway	KEGG PATHWAY	mmu04015	43	214	0.000598416	0.0193737	ENSMUSG00000009376|ENSMUSG00000026821|ENSMUSG00000027954|ENSMUSG00000037225|ENSMUSG00000030403|ENSMUSG00000031465|ENSMUSG00000002699|ENSMUSG00000005534|ENSMUSG00000052681|ENSMUSG00000059003|ENSMUSG00000031565|ENSMUSG00000005533|ENSMUSG00000029231|ENSMUSG00000022220|ENSMUSG00000018293|ENSMUSG00000000489|ENSMUSG00000024620|ENSMUSG00000029648|ENSMUSG00000004056|ENSMUSG00000057967|ENSMUSG00000019966|…	mmu:17295|mmu:19730|mmu:13636|mmu:14173|mmu:22323|mmu:11601|mmu:16822|mmu:16337|mmu:215449|mmu:14811|mmu:14182|mmu:16001|mmu:18595|mmu:104110|mmu:18643|mmu:18591|mmu:18596|mmu:14254|mmu:11652|mmu:14172|mmu:17311|mmu:14186|mmu:16409|mmu:16412|mmu:14257|mmu:21687|mmu:18654|mmu:13640|mmu:18760|mmu:21894|mmu:64143|mmu:16542|mmu:54635|mmu:11512|mmu:16408|mmu:20130|mmu:21825|mmu:16414|mmu:223864|mmu:54…	17295|19730|13636|14173|22323|11601|16822|16337|215449|14811|14182|16001|18595|104110|18643|18591|18596|14254|11652|14172|17311|14186|16409|16412|14257|21687|18654|13640|18760|21894|64143|16542|54635|11512|16408|20130|21825|16414|223864|54519|217944|106952|74055|	http://www.genome.jp/kegg-bin/show_pathway?mmu04015/mmu:17311%09red/mmu:215449%09red/mmu:11601%09red/mmu:16409%09red/mmu:16408%09red/mmu:16542%09red/mmu:14173%09red/mmu:14172%09red/mmu:14811%09red/mmu:18643%09red/mmu:11512%09red/mmu:217944%09red/mmu:18760%09red/mmu:21825%09red/mmu:64143%09red/mmu:16337%09red/mmu:14186%09red/mmu:106952%09red/mmu:21894%09red/mmu:14182%09red/mmu:104110%09red/mmu:197…
Proteoglycans in cancer	KEGG PATHWAY	mmu05205	41	205	0.000854712	0.0240741	ENSMUSG00000009376|ENSMUSG00000022831|ENSMUSG00000031207|ENSMUSG00000037225|ENSMUSG00000018166|ENSMUSG00000026193|ENSMUSG00000021994|ENSMUSG00000025351|ENSMUSG00000031565|ENSMUSG00000028763|ENSMUSG00000005533|ENSMUSG00000000555|ENSMUSG00000030287|ENSMUSG00000004266|ENSMUSG00000046223|ENSMUSG00000042644|ENSMUSG00000004056|ENSMUSG00000070348|ENSMUSG00000021109|ENSMUSG00000085939|ENSMUSG00000041075|…	mmu:17295|mmu:15163|mmu:17698|mmu:14173|mmu:13867|mmu:14268|mmu:22418|mmu:12512|mmu:14182|mmu:15530|mmu:16001|mmu:16402|mmu:16439|mmu:15170|mmu:18793|mmu:16440|mmu:11652|mmu:12443|mmu:15251|mmu:12512|mmu:14369|mmu:14370|mmu:20969|mmu:20971|mmu:22350|mmu:19206|mmu:21898|mmu:16412|mmu:29875|mmu:14362|mmu:16542|mmu:13043|mmu:20130|mmu:21825|mmu:20848|mmu:192176|mmu:13866|mmu:74055|mmu:12389|mmu:1239…	17295|15163|17698|14173|13867|14268|22418|12512|14182|15530|16001|16402|16439|15170|18793|16440|11652|12443|15251|12512|14369|14370|20969|20971|22350|19206|21898|16412|29875|14362|16542|13043|20130|21825|20848|192176|13866|74055|12389|12390|14102|	http://www.genome.jp/kegg-bin/show_pathway?mmu05205/mmu:22350%09red/mmu:16542%09red/mmu:14173%09red/mmu:16402%09red/mmu:12512%09red/mmu:20130%09red/mmu:192176%09red/mmu:21825%09red/mmu:20971%09red/mmu:13866%09red/mmu:14369%09red/mmu:12390%09red/mmu:14268%09red/mmu:14182%09red/mmu:14362%09red/mmu:15170%09red/mmu:20848%09red/mmu:13043%09red/mmu:21898%09red/mmu:14102%09red/mmu:19206%09red/mmu:16412%…
Pertussis	KEGG PATHWAY	mmu05133	20	74	0.000929503	0.0240741	ENSMUSG00000000555|ENSMUSG00000073418|ENSMUSG00000038058|ENSMUSG00000032508|ENSMUSG00000000290|ENSMUSG00000030786|ENSMUSG00000025809|ENSMUSG00000059883|ENSMUSG00000003184|ENSMUSG00000032691|ENSMUSG00000051439|ENSMUSG00000025888|ENSMUSG00000055172|ENSMUSG00000020826|ENSMUSG00000027398|ENSMUSG00000041515|ENSMUSG00000083750|ENSMUSG00000029371|ENSMUSG00000032041|ENSMUSG00000039005	mmu:16402|mmu:12268|mmu:107607|mmu:17874|mmu:16414|mmu:16409|mmu:16412|mmu:266632|mmu:54131|mmu:216799|mmu:12475|mmu:12362|mmu:50909|mmu:18126|mmu:16176|mmu:15900|mmu:12631|mmu:20311|mmu:117149|mmu:21898|	16402|12268|107607|17874|16414|16409|16412|266632|54131|216799|12475|12362|50909|18126|16176|15900|12631|20311|117149|21898|	http://www.genome.jp/kegg-bin/show_pathway?mmu05133/mmu:12631%09red/mmu:16412%09red/mmu:117149%09red/mmu:16414%09red/mmu:16409%09red/mmu:216799%09red/mmu:21898%09red/mmu:16402%09red/mmu:12475%09red/mmu:54131%09red/mmu:15900%09red/mmu:20311%09red/mmu:12362%09red/mmu:50909%09red/mmu:107607%09red/mmu:18126%09red/mmu:266632%09red/mmu:12268%09red/mmu:17874%09red/mmu:16176%09red
HIF-1 signaling pathway	KEGG PATHWAY	mmu04066	26	111	0.00109743	0.024627	ENSMUSG00000025877|ENSMUSG00000030339|ENSMUSG00000020009|ENSMUSG00000029648|ENSMUSG00000098050|ENSMUSG00000003031|ENSMUSG00000005534|ENSMUSG00000020826|ENSMUSG00000031465|ENSMUSG00000005533|ENSMUSG00000028645|ENSMUSG00000006386|ENSMUSG00000004056|ENSMUSG00000063229|ENSMUSG00000001131|ENSMUSG00000021109|ENSMUSG00000028978|ENSMUSG00000039005|ENSMUSG00000037411|ENSMUSG00000031490|ENSMUSG00000015340|…	mmu:212032|mmu:17000|mmu:15979|mmu:14254|mmu:100042025|mmu:12576|mmu:16337|mmu:18126|mmu:11601|mmu:16001|mmu:20525|mmu:21687|mmu:11652|mmu:16828|mmu:21857|mmu:15251|mmu:18127|mmu:21898|mmu:18787|mmu:13685|mmu:13058|mmu:22041|mmu:20848|mmu:13866|mmu:112407|mmu:12043|	212032|17000|15979|14254|100042025|12576|16337|18126|11601|16001|20525|21687|11652|16828|21857|15251|18127|21898|18787|13685|13058|22041|20848|13866|112407|12043|	http://www.genome.jp/kegg-bin/show_pathway?mmu04066/mmu:212032%09red/mmu:11601%09red/mmu:12043%09red/mmu:13685%09red/mmu:100042025%09red/mmu:16337%09red/mmu:15979%09red/mmu:13866%09red/mmu:20525%09red/mmu:12576%09red/mmu:21898%09red/mmu:18787%09red/mmu:20848%09red/mmu:18126%09red/mmu:22041%09red/mmu:112407%09red/mmu:16001%09red/mmu:15251%09red/mmu:21857%09red/mmu:11652%09red/mmu:14254%09red/mmu:1…
ECM-receptor interaction	KEGG PATHWAY	mmu04512	22	88	0.00126531	0.024627	ENSMUSG00000048126|ENSMUSG00000028364|ENSMUSG00000001930|ENSMUSG00000029304|ENSMUSG00000026193|ENSMUSG00000028763|ENSMUSG00000000555|ENSMUSG00000027009|ENSMUSG00000042284|ENSMUSG00000023885|ENSMUSG00000020592|ENSMUSG00000021702|ENSMUSG00000027111|ENSMUSG00000017009|ENSMUSG00000025809|ENSMUSG00000002944|ENSMUSG00000002900|ENSMUSG00000040152|ENSMUSG00000031503|ENSMUSG00000031502|ENSMUSG00000019846|…	mmu:12835|mmu:21923|mmu:22371|mmu:20750|mmu:14268|mmu:15530|mmu:16402|mmu:16401|mmu:109700|mmu:21826|mmu:20969|mmu:21828|mmu:16403|mmu:20971|mmu:16412|mmu:12491|mmu:16777|mmu:21825|mmu:12827|mmu:12826|mmu:16775|mmu:53867|	12835|21923|22371|20750|14268|15530|16402|16401|109700|21826|20969|21828|16403|20971|16412|12491|16777|21825|12827|12826|16775|53867|	http://www.genome.jp/kegg-bin/show_pathway?mmu04512/mmu:16775%09red/mmu:12491%09red/mmu:16777%09red/mmu:22371%09red/mmu:16403%09red/mmu:16402%09red/mmu:16401%09red/mmu:21828%09red/mmu:21923%09red/mmu:21825%09red/mmu:20971%09red/mmu:14268%09red/mmu:109700%09red/mmu:12827%09red/mmu:12826%09red/mmu:16412%09red/mmu:20969%09red/mmu:21826%09red/mmu:53867%09red/mmu:12835%09red/mmu:20750%09red/mmu:15530%…
Leishmaniasis	KEGG PATHWAY	mmu05140	18	65	0.00130053	0.024627	ENSMUSG00000020009|ENSMUSG00000039005|ENSMUSG00000032508|ENSMUSG00000026480|ENSMUSG00000000290|ENSMUSG00000030786|ENSMUSG00000021253|ENSMUSG00000025809|ENSMUSG00000059883|ENSMUSG00000004266|ENSMUSG00000015947|ENSMUSG00000015950|ENSMUSG00000026104|ENSMUSG00000020826|ENSMUSG00000027398|ENSMUSG00000027009|ENSMUSG00000006519|ENSMUSG00000071715	mmu:15979|mmu:21898|mmu:17874|mmu:17970|mmu:16414|mmu:16409|mmu:21809|mmu:16412|mmu:266632|mmu:15170|mmu:14129|mmu:17969|mmu:20846|mmu:18126|mmu:16176|mmu:16401|mmu:13057|mmu:17972|	15979|21898|17874|17970|16414|16409|21809|16412|266632|15170|14129|17969|20846|18126|16176|16401|13057|17972|	http://www.genome.jp/kegg-bin/show_pathway?mmu05140/mmu:21809%09red/mmu:16412%09red/mmu:16414%09red/mmu:16409%09red/mmu:21898%09red/mmu:15170%09red/mmu:14129%09red/mmu:17970%09red/mmu:17972%09red/mmu:13057%09red/mmu:16176%09red/mmu:17969%09red/mmu:20846%09red/mmu:18126%09red/mmu:266632%09red/mmu:16401%09red/mmu:17874%09red/mmu:15979%09red
Complement and coagulation cascades	KEGG PATHWAY	mmu04610	20	77	0.00139853	0.024627	ENSMUSG00000022912|ENSMUSG00000073418|ENSMUSG00000030111|ENSMUSG00000031444|ENSMUSG00000028128|ENSMUSG00000028001|ENSMUSG00000037411|ENSMUSG00000046223|ENSMUSG00000001930|ENSMUSG00000040552|ENSMUSG00000038224|ENSMUSG00000016481|ENSMUSG00000049130|ENSMUSG00000026365|ENSMUSG00000032679|ENSMUSG00000055172|ENSMUSG00000071178|ENSMUSG00000031196|ENSMUSG00000039109|ENSMUSG00000089991	mmu:19128|mmu:12268|mmu:232345|mmu:14058|mmu:14066|mmu:14161|mmu:18787|mmu:18793|mmu:22371|mmu:12267|mmu:18816|mmu:12946|mmu:12273|mmu:12628|mmu:12509|mmu:50909|mmu:20701|mmu:14069|mmu:74145|mmu:12628|	19128|12268|232345|14058|14066|14161|18787|18793|22371|12267|18816|12946|12273|12628|12509|50909|20701|14069|74145|12628|	http://www.genome.jp/kegg-bin/show_pathway?mmu04610/mmu:12267%09red/mmu:14058%09red/mmu:12273%09red/mmu:19128%09red/mmu:14069%09red/mmu:12628%09red/mmu:74145%09red/mmu:14066%09red/mmu:22371%09red/mmu:18816%09red/mmu:18787%09red/mmu:12946%09red/mmu:50909%09red/mmu:18793%09red/mmu:20701%09red/mmu:12509%09red/mmu:232345%09red/mmu:14161%09red/mmu:12268%09red
Pathways in cancer	KEGG PATHWAY	mmu05200	57	323	0.00142627	0.024627	ENSMUSG00000009376|ENSMUSG00000026821|ENSMUSG00000021466|ENSMUSG00000037992|ENSMUSG00000027684|ENSMUSG00000036986|ENSMUSG00000037225|ENSMUSG00000003031|ENSMUSG00000030110|ENSMUSG00000004446|ENSMUSG00000021994|ENSMUSG00000031565|ENSMUSG00000005533|ENSMUSG00000028645|ENSMUSG00000029231|ENSMUSG00000026029|ENSMUSG00000032440|ENSMUSG00000024620|ENSMUSG00000027985|ENSMUSG00000004056|ENSMUSG00000026193|…	mmu:17295|mmu:19730|mmu:19206|mmu:19401|mmu:14013|mmu:18854|mmu:14173|mmu:12576|mmu:19713|mmu:12122|mmu:22418|mmu:14182|mmu:16001|mmu:20525|mmu:18595|mmu:12370|mmu:21813|mmu:18596|mmu:16842|mmu:11652|mmu:14268|mmu:13866|mmu:14172|mmu:17311|mmu:15251|mmu:76551|mmu:14369|mmu:14370|mmu:12385|mmu:16403|mmu:12567|mmu:12571|mmu:12443|mmu:21809|mmu:16412|mmu:20846|mmu:21802|mmu:18591|mmu:433759|mmu:1865…	17295|19730|19206|19401|14013|18854|14173|12576|19713|12122|22418|14182|16001|20525|18595|12370|21813|18596|16842|11652|14268|13866|14172|17311|15251|76551|14369|14370|12385|16403|12567|12571|12443|21809|16412|20846|21802|18591|433759|18654|14362|64143|16777|18126|20848|12827|12826|12006|20423|112407|12159|16775|13819|12986|12395|12043|14102|	http://www.genome.jp/kegg-bin/show_pathway?mmu05200/mmu:17311%09red/mmu:12571%09red/mmu:16775%09red/mmu:14013%09red/mmu:16777%09red/mmu:12043%09red/mmu:14173%09red/mmu:14172%09red/mmu:16403%09red/mmu:112407%09red/mmu:12122%09red/mmu:21809%09red/mmu:12370%09red/mmu:18854%09red/mmu:20423%09red/mmu:12006%09red/mmu:21802%09red/mmu:64143%09red/mmu:12395%09red/mmu:12576%09red/mmu:13866%09red/mmu:14369%…
Bacterial invasion of epithelial cells	KEGG PATHWAY	mmu05100	19	77	0.00296888	0.0480587	ENSMUSG00000037148|ENSMUSG00000000555|ENSMUSG00000033335|ENSMUSG00000029622|ENSMUSG00000022831|ENSMUSG00000041112|ENSMUSG00000025809|ENSMUSG00000046993|ENSMUSG00000000058|ENSMUSG00000058325|ENSMUSG00000058013|ENSMUSG00000059248|ENSMUSG00000026193|ENSMUSG00000036885|ENSMUSG00000007655|ENSMUSG00000009376|ENSMUSG00000037815|ENSMUSG00000035109|ENSMUSG00000031078	mmu:78514|mmu:16402|mmu:13430|mmu:11867|mmu:15163|mmu:140580|mmu:16412|mmu:434782|mmu:12390|mmu:330662|mmu:52398|mmu:53860|mmu:14268|mmu:622434|mmu:12389|mmu:17295|mmu:12385|mmu:271849|mmu:13043|	78514|16402|13430|11867|15163|140580|16412|434782|12390|330662|52398|53860|14268|622434|12389|17295|12385|271849|13043|	http://www.genome.jp/kegg-bin/show_pathway?mmu05100/mmu:16412%09red/mmu:140580%09red/mmu:14268%09red/mmu:330662%09red/mmu:17295%09red/mmu:271849%09red/mmu:52398%09red/mmu:16402%09red/mmu:622434%09red/mmu:434782%09red/mmu:53860%09red/mmu:15163%09red/mmu:11867%09red/mmu:13043%09red/mmu:12385%09red/mmu:12390%09red/mmu:78514%09red/mmu:13430%09red/mmu:12389%09red
